# Supplementary material for: Importance of natural land cover for plant species’ conservation: A nationwide study in The Netherlands
Source: PLoS One. 2021 Nov 16;16(11):e0259255. doi: 10.1371/journal.pone.0259255 (PMC8594855; doi:10.1371/journal.pone.0259255)
Supplement: S4 Table — (XLSX) [file pone.0259255.s005.xlsx]

## Sheet: corr_matrix
	Bio_axis1	Bio_axis2	Bio_axis3	Bio_axis4	Bio_axis5	NLC	NLCF	NLCO	Soil1	Soil2	Soil3	Soil4	Soil5	Soil6	Soil7	Soil8	Soil9	Soil10
Bio_axis1	1	-0.0033179	-0.0045321	0.00962369	-0.00581952	0.134633	0.247255	-0.067814	-0.0573199	0.206588	-0.280229	-0.19665	0.0251249	-0.127002	-0.054411	0.415601	-0.140008	-0.174775
Bio_axis2	-0.0033179	1	0.00764744	-0.00350304	0.0129934	-0.0630741	-0.0733875	-0.0163223	0.110812	0.0156752	0.0593586	0.141359	-0.18722	-0.09524	0.0430497	-0.188311	0.0217268	0.220731
Bio_axis3	-0.0045321	0.00764744	1	0.00550666	0.0125873	-0.178709	-0.16478	-0.0951332	-0.0889795	-0.293272	-0.0247291	0.154811	0.0918322	-0.0893765	-0.0151203	0.111512	-0.107439	0.0487278
Bio_axis4	0.00962369	-0.00350304	0.00550666	1	0.0180751	0.0238206	0.00505351	0.0318395	0.0864409	0.375359	-0.0563778	-0.0379096	-0.0439754	-0.0109894	-0.0235502	-0.0263054	-0.0560397	-0.0511147
Bio_axis5	-0.00581952	0.0129934	0.0125873	0.0180751	1	-0.00364754	-0.0228159	0.0200973	-0.0544315	0.324506	0.0761813	0.133027	-0.0346221	-0.0333075	-0.00445235	-0.162471	-0.0168373	0.0814173
NLC	0.134633	-0.0630741	-0.178709	0.0238206	-0.00364754	1	0.775327	0.69858	-0.0562863	0.00612244	-0.141866	-0.171527	0.000902411	-0.0329864	0.155642	0.329239	-0.153233	-0.18092
NLCF	0.247255	-0.0733875	-0.16478	0.00505351	-0.0228159	0.775327	1	0.0897265	-0.112027	0.0211489	-0.142974	-0.159433	-0.0341627	-0.121885	-0.0431361	0.418565	-0.139415	-0.186552
NLCO	-0.067814	-0.0163223	-0.0951332	0.0318395	0.0200973	0.69858	0.0897265	1	0.0381588	-0.0143058	-0.0617382	-0.0898655	0.0401281	0.0860715	0.294318	0.0449907	-0.0836962	-0.0739529
Soil1	-0.0573199	0.110812	-0.0889795	0.0864409	-0.0544315	-0.0562863	-0.112027	0.0381588	1	-0.010864	-0.0893809	-0.10217	-0.0732538	-0.0992411	0.0268564	-0.251616	-0.0852261	-0.0950625
Soil2	0.206588	0.0156752	-0.293272	0.375359	0.324506	0.00612244	0.0211489	-0.0143058	-0.010864	1	-0.0599827	-0.0509241	-0.0325927	-0.0504422	-0.02632	-0.11315	-0.0467489	-0.0559631
Soil3	-0.280229	0.0593586	-0.0247291	-0.0563778	0.0761813	-0.141866	-0.142974	-0.0617382	-0.0893809	-0.0599827	1	-0.0497796	-0.0945421	-0.104382	0.00546409	-0.395789	0.058313	0.0734658
Soil4	-0.19665	0.141359	0.154811	-0.0379096	0.133027	-0.171527	-0.159433	-0.0898655	-0.10217	-0.0509241	-0.0497796	1	-0.0846265	-0.114477	-0.00360305	-0.328491	-0.105181	0.147867
Soil5	0.0251249	-0.18722	0.0918322	-0.0439754	-0.0346221	0.000902411	-0.0341627	0.0401281	-0.0732538	-0.0325927	-0.0945421	-0.0846265	1	0.0696291	-0.0120261	-0.0156759	-0.08106	-0.107182
Soil6	-0.127002	-0.09524	-0.0893765	-0.0109894	-0.0333075	-0.0329864	-0.121885	0.0860715	-0.0992411	-0.0504422	-0.104382	-0.114477	0.0696291	1	-0.00204025	-0.265145	-0.0348423	-0.138063
Soil7	-0.054411	0.0430497	-0.0151203	-0.0235502	-0.00445235	0.155642	-0.0431361	0.294318	0.0268564	-0.02632	0.00546409	-0.00360305	-0.0120261	-0.00204025	1	-0.114154	-0.0139636	0.00778664
Soil8	0.415601	-0.188311	0.111512	-0.0263054	-0.162471	0.329239	0.418565	0.0449907	-0.251616	-0.11315	-0.395789	-0.328491	-0.0156759	-0.265145	-0.114154	1	-0.336449	-0.420527
Soil9	-0.140008	0.0217268	-0.107439	-0.0560397	-0.0168373	-0.153233	-0.139415	-0.0836962	-0.0852261	-0.0467489	0.058313	-0.105181	-0.08106	-0.0348423	-0.0139636	-0.336449	1	-0.0189034
Soil10	-0.174775	0.220731	0.0487278	-0.0511147	0.0814173	-0.18092	-0.186552	-0.0739529	-0.0950625	-0.0559631	0.0734658	0.147867	-0.107182	-0.138063	0.00778664	-0.420527	-0.0189034	1
